# Supplementary material
Source: Research Square preprint supplement (doi:10.21203/rs.3.rs-9295482/v1)
Supplement: Supplementary file 1 [file 1794fa5253c2656db638ccf7.docx]

| SAVE Items | Was the item retained in the final SAVE? |
| --- | --- |
|
| **Section 1** |  |
| *How often do you speak or answer for your child when they are:* |  |
| Interacting with a familiar adult (e.g., relatives that don’t live in the home, family friends) | Y |
| Interacting with a stranger (e.g., cashier at grocery store) | Y |
| Interacting with a familiar peer (e.g., during playdates) | N |
| Interacting with an unfamiliar peer (e.g., on the playground) | Y |
| Ordering at a restaurant | Y |
| **Section 2** |  |
| *How often do you allow your child to whisper in your ear when they are:* |  |
| Interacting with a familiar adult (e.g., relatives that don’t live in the home, family friends) | Y |
| Interacting with a stranger (e.g., cashier at grocery store) | Y |
| Interacting with a familiar peer (e.g., during playdates) | N |
| Interacting with an unfamiliar peer (e.g., on the playground) | Y |
| Ordering at a restaurant | Y |
| **Section 3** |  |
| *How often do you allow your child to communicate nonverbally when they are:* |  |
| Interacting with a familiar adult (e.g., relatives that don’t live in the home, family friends) | Y |
| Interacting with a stranger (e.g., cashier at grocery store) | Y |
| Interacting with a familiar peer (e.g., during playdates) | N |
| Interacting with an unfamiliar peer (e.g., on the playground) | Y |
| Ordering at a restaurant | Y |
| **Section 4** |  |
| *How often do you:* |  |
| Speak with your child’s teacher or other school personnel in order to have your child skip an assignment or activity requiring them to speak | Y |
| Advocate for your child to have special accommodations in class that get them out of speaking | Y |
| Allow your child to skip a performance requiring them to speak or sing | Y |
| Go on field trips with your child in case they are required to speak | Y |
| Go other places with your child in case they are required to speak | Y |
| Avoid putting your child in activities or situations where they might be required to speak | Y |

**Supplemental Material**

Table S1. Initial SAVE item pool.

Note: SAVE items were rated using a 5-point Likert scale (0 = never, 1 = seldom, 2 = sometimes, 3 = often, 4 = very often, 5 = always).

Table S2. Confirmatory factor analysis fit indices across tested models using ML.

| Model | # of factors | # of items | 2 | CFI | RMSEA | SRMR | Fit Categorya |
| --- | --- | --- | --- | --- | --- | --- | --- |
| 1a | 1 | 21 | 3771.531 | 0.569 | 0.224 | 0.134 | Poor |
| 2b | 4 | 21 | 790.839 | 0.925 | 0.095 | 0.055 | Poor |
| 3c | 4 | 18 | 596.045 | 0.930 | 0.100 | 0.055 | Poor |
| 4d | 4 | 18 | 411.041 | 0.956 | 0.078 | 0.050 | Acceptable |

Note: A model was deemed “acceptable” if two of the three (CFI, RMSEA, SRMR) indices fell in good ranges. A model was deemed “poor” if only one or none of the fit indices fell in good ranges.

a Model 1 = Unifactorial Model: All 21 items from the original SAVE item pool load onto a single factor.

b Model 2 = Four-factor 21 Item Model: All 21 items from the original SAVE item pool are included and load onto four factors that correspond to the four different SAVE subsections.

c Model 3 = Four-factor, 18 Item Model, excluding familiar adult interactions: The three items assessing accommodation when the child interacts with familiar adults are removed, and the remaining 18 items from the original SAVE item pool load onto four factors that correspond to the four different SAVE subsections.

d Model 4 = Four-factor 18 Item Model, excluding familiar peer interactions: The three items assessing accommodation when the child interacts with familiar peers are removed, and the remaining 18 items from the original SAVE item pool load onto four factors that correspond to the four different SAVE subsections
